# Supplementary figures and images for: Continuous measurement of mercury in flue gas using ICP-OES
Source: Royal Society of Chemistry journal article supplement (doi:10.1039/b400578c), 2004-01-01

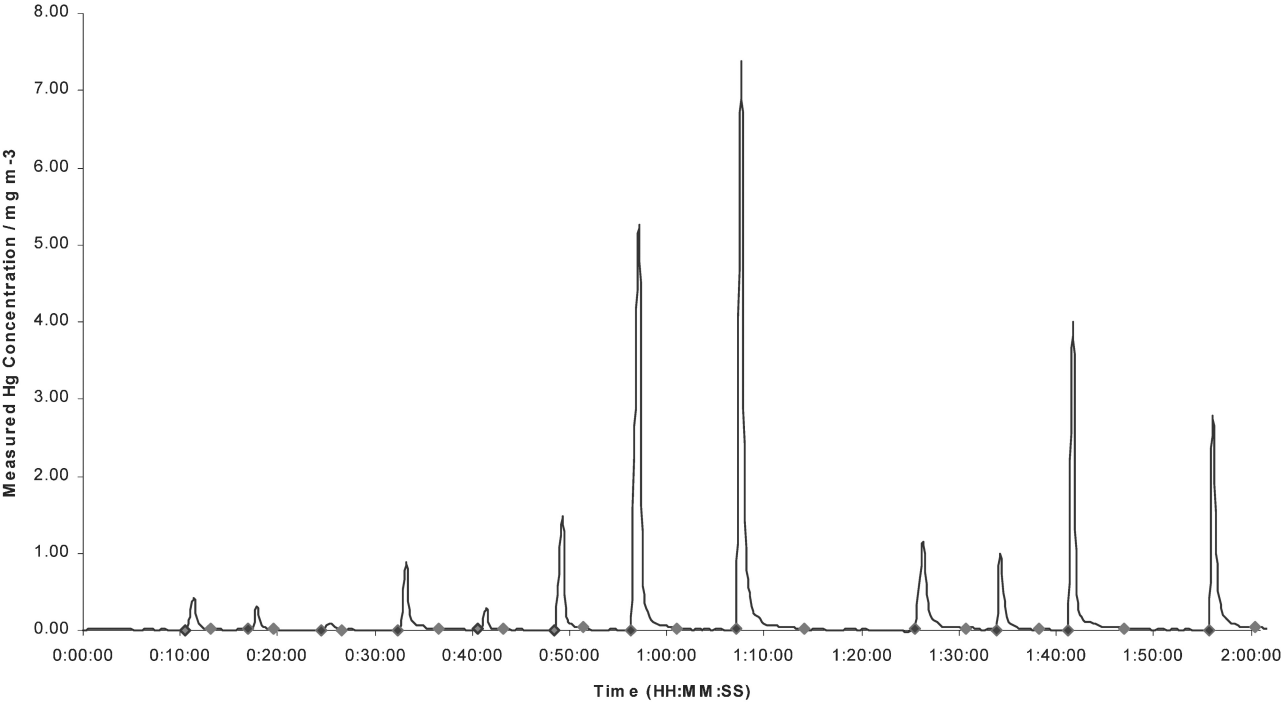

— mg m-3

◆ Peak start

◆ Peak stop

Supplement: b400578c-fs1.pdf [file b400578c-fs1.pdf]
